# Supplementary material for: Prevention of Adult Colitis by Oral Ferric Iron in Juvenile Mice Is Associated with the Inhibition of the Tbet Promoter Hypomethylation and Gene Overexpression
Source: MDPI journal article supplement (doi:10.3390/nu11081758), 2019-07-31
Supplement: s1 [file s1]

**Figure S1**

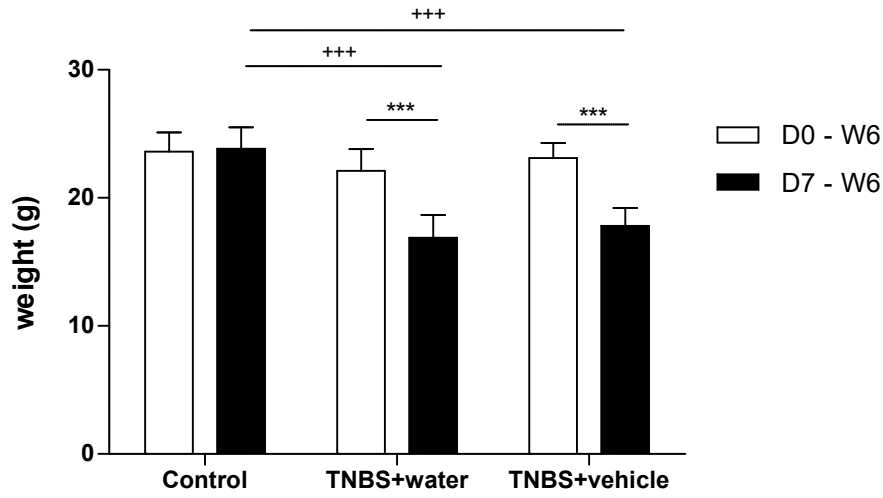

**a**

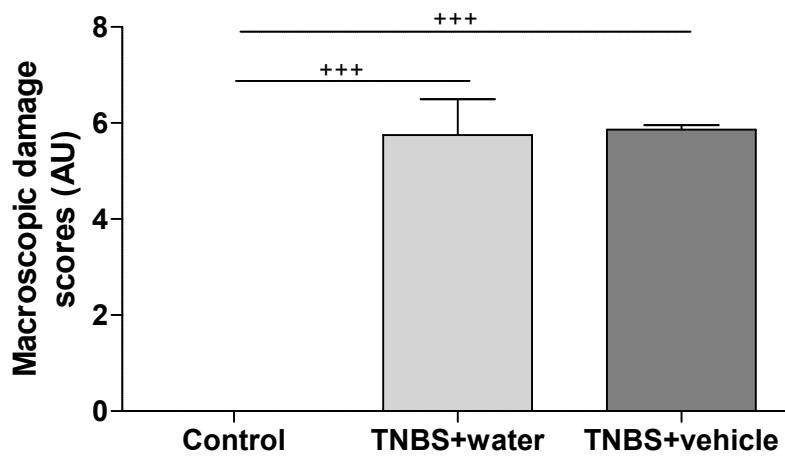

**b**

Incidence of lecithin beads microcapsules without ferric pyrophosphate on weight variations (**a**) and macroscopic lesions (**b**). Control mice (control), TNBS mice treated with water (TNBS+water) or TNBS mice treated with lecithin beads microcapsules without ferric pyrophosphate (TNBS+vehicle). Data are expressed as mean  $\pm$  SEM. n=9 for each group.

a \*\*\* Significantly different ( $P < 0.001$ ) from D0-W6 of same treatment. +++ Significantly different ( $P < 0.001$ ) from D7-W6 of Control

b. +++ Significantly different ( $P < 0.001$ ) from Control
